# Supplementary material for: ForceGen: atomic covalent bond value derivation for Gromacs
Source: PubMed Central journal article supplement (PMC5719132; doi:10.1007/s00894-017-3530-6), 2017-12-06
Supplement: 894_2017_3530_MOESM1_ESM.pdf [file 894_2017_3530_MOESM1_ESM.pdf]

# Supplementary Information: ForceGen: atomic covalent bond constant derivation for Gromacs.

Anthony Nash,<sup>†</sup> Thomas Collier,<sup>‡</sup> Helen L Birch,<sup>¶</sup> and Nora H de Leeuw<sup>\*,†,§</sup>

<sup>†</sup>*University College London, Department of Chemistry, London, WC1E 6BT, UK*

<sup>‡</sup>*Massey University, New Zealand*

<sup>¶</sup>*University College London, Institute of Orthopaedics and Musculoskeletal Science, Royal National Orthopaedic Hospital, Stanmore, HA7 4LP, UK*

<sup>§</sup>*Cardiff University, School of Chemistry, Cardiff, CF10 3AT, UK*

E-mail: a.nash@ucl.ac.uk

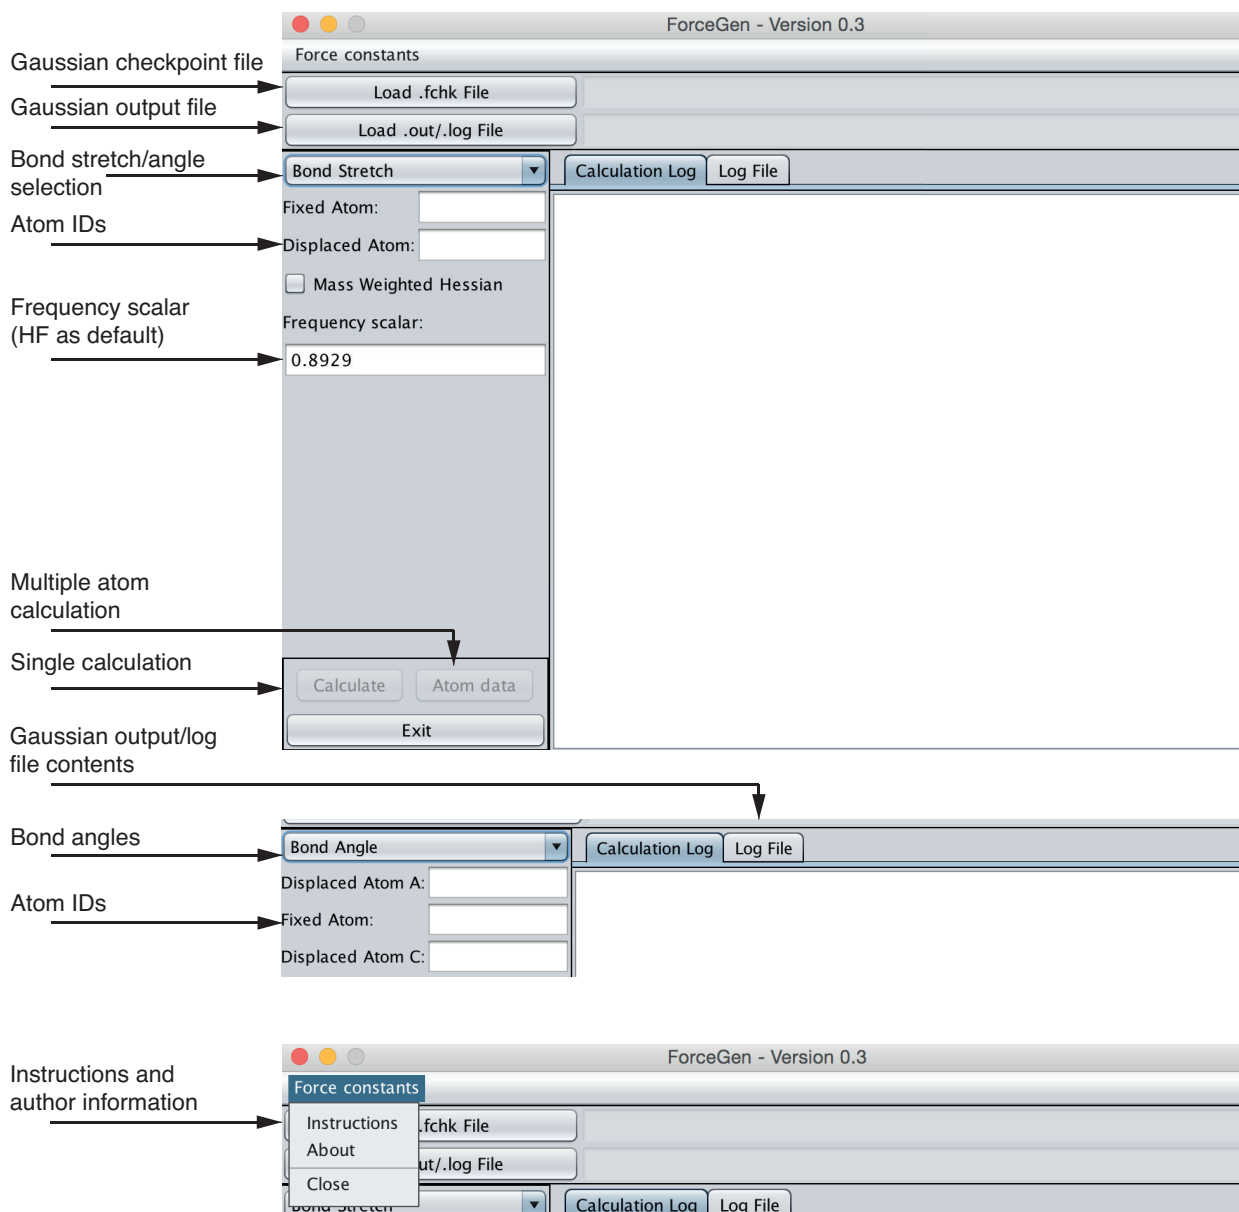

Figure 1: Screenshots of the bond stretch, bond angle and menu screen.

Bond stretch atom IDs  
with atom types

```
Stretch
47 5 N GC13
5 6 GC13 G01
5 4 GC13 GC1
4 12 GC1 GH1
4 3 GC1 GN5
3 21 GN5 GH2
3 1 GN5 C
4 7 GC1 GC2
7 8 GC2 GC3
8 9 GC3 GC4
9 10 GC4 GC5
10 11 GC5 GN1
7 13 GC2 GH3
7 14 GC2 GH4
8 15 GC3 GH5
8 16 GC3 GH6
9 17 GC4 GH7
9 18 GC4 GH8
10 19 GC5 GH9
10 20 GC5 GH10
```

Bond stretch (with eq length) force constants - gromacs compatible

```
GROMACS - atom types internal to Gromacs (supplied by user)
i j func len_eq(nm) FC (kJ/mol/nm^2)
N GC13 1 0.134 194129.527
GC13 G01 1 0.121 247488.448
GC13 GC1 1 0.153 61750.248
GC1 GH1 1 0.108 159269.846
GC1 GN5 1 0.145 116409.974
GN5 GH2 1 0.100 201207.446
GN5 C 1 0.136 167023.302
GC1 GC2 1 0.154 75726.923
GC2 GC3 1 0.154 77503.248
GC3 GC4 1 0.153 161472.264
GC4 GC5 1 0.154 75284.156
GC5 GN1 1 0.145 113535.046
GC2 GH3 1 0.109 86270.049
GC2 GH4 1 0.109 81149.230
GC3 GH5 1 0.109 77043.771
GC3 GH6 1 0.108 31021.950
GC4 GH7 1 0.109 133280.148
GC4 GH8 1 0.109 43397.133
GC5 GH9 1 0.109 38652.885
GC5 GH10 1 0.108 122297.001
```

Bond angle atom IDs  
with atom types

```
ANGLE
52 47 5 CA N GC13
53 47 5 H N GC13
47 5 6 N GC13 G01
47 5 4 N GC13 GC1
6 5 4 G01 GC13 GC1
5 4 12 GC13 GC1 GH1
5 4 7 GC13 GC1 GC2
5 4 3 GC13 GC1 GN5
4 7 8 GC1 GC2 GC3
4 3 21 GC1 GN5 GH2
4 3 1 GC1 GN5 C
12 4 7 GH1 GC1 GC2
12 4 3 GH1 GC1 GN5
3 1 2 GN5 C O
3 1 57 GN5 C CA
21 3 1 GH2 GN5 C
4 7 13 GC1 GC2 GH3
4 7 14 GC1 GC2 GH4
3 4 7 GN5 GC1 GC2
13 7 14 GH3 GC2 GH4
13 7 8 GH3 GC2 GC3
14 7 8 GH4 GC2 GC3
8 9 10 GC3 GC4 GC5
7 8 15 GC2 GC3 GH5
7 8 16 GC2 GC3 GH6
15 8 16 GH5 GC3 GH6
15 8 9 GH5 GC3 GC4
16 8 9 GH6 GC3 GC4
8 9 10 GC3 GC4 GC5
```

Bond angle (with eq angle) force constants - gromacs compatible

```
GROMACS - atom types internal to Gromacs (supplied by user)
i j k func deg_eq(degree) FC (kJ/mol/rad^2)
CA N GC13 1 121.758 309.827
H N GC13 1 117.909 146.613
N GC13 G01 1 122.832 283.822
N GC13 GC1 1 117.087 424.555
G01 GC13 GC1 1 119.915 338.460
GC13 GC1 GH1 1 105.620 208.972
GC13 GC1 GC2 1 109.621 509.974
GC13 GC1 GN5 1 111.971 256.997
GC1 GC2 GC3 1 113.614 195.721
GC1 GN5 GH2 1 117.216 103.950
GC1 GN5 C 1 120.147 269.623
GH1 GC1 GC2 1 110.078 244.702
GH1 GC1 GN5 1 109.690 167.903
GN5 C O 1 121.597 229.835
GN5 C CA 1 115.731 189.496
GH2 GN5 C 1 117.581 121.311
GC1 GC2 GH3 1 108.616 264.451
GC1 GC2 GH4 1 108.507 313.210
GN5 GC1 GC2 1 109.786 271.144
GH3 GC2 GH4 1 106.380 126.597
GH3 GC2 GC3 1 110.466 173.209
GH4 GC2 GC3 1 108.989 243.480
GC3 GC4 GC5 1 114.479 261.649
GC2 GC3 GH5 1 109.188 104.360
GC2 GC3 GH6 1 109.878 330.892
GH5 GC3 GH6 1 106.348 135.044
GH5 GC3 GC4 1 110.316 207.938
GH6 GC3 GC4 1 109.027 217.524
GC3 GC4 GC5 1 114.479 261.649
```

Figure 2: Example content of bond stretch input file, bond angle input file, and their corresponding output, ready for immediate implementation into Gromacs.

Table 1: Bond stretch and bond angle force constants and equilibrium constants for a toluene molecule.

| Bond stretch                                   | HF             |                                       | MP2            |                                       |
|------------------------------------------------|----------------|---------------------------------------|----------------|---------------------------------------|
|                                                | $b_o$ (nm)     | $k_b$ (kJ/mol/nm <sup>2</sup> )       | $b_o$ (nm)     | $k_b$ (kJ/mol/nm <sup>2</sup> )       |
| C <sub>1</sub> -C <sub>2</sub>                 | 0.151          | 117353.442                            | 0.151          | 109366.164                            |
| C <sub>2</sub> -C <sub>3</sub>                 | 0.139          | 150796.992                            | 0.140          | 150015.724                            |
| C <sub>2</sub> -C <sub>4</sub>                 | 0.139          | 150676.708                            | 0.140          | 150017.034                            |
| C <sub>3</sub> -C <sub>5</sub>                 | 0.139          | 181861.382                            | 0.140          | 175061.010                            |
| C <sub>4</sub> -C <sub>6</sub>                 | 0.139          | 182085.289                            | 0.140          | 175059.713                            |
| C <sub>5</sub> -C <sub>7</sub>                 | 0.139          | 227825.122                            | 0.140          | 160179.358                            |
| C <sub>6</sub> -C <sub>7</sub>                 | 0.139          | 227725.070                            | 0.140          | 160180.282                            |
| C <sub>1</sub> -H <sub>1</sub>                 | 0.108          | 99842.951                             | 0.109          | 128829.737                            |
| C <sub>1</sub> -H <sub>2</sub>                 | 0.109          | 48354.522                             | 0.109          | 128826.599                            |
| C <sub>1</sub> -H <sub>3</sub>                 | 0.108          | 103040.767                            | 0.110          | 44553.997                             |
| C <sub>3</sub> -H <sub>4</sub>                 | 0.108          | 174987.164                            | 0.109          | 160346.806                            |
| C <sub>4</sub> -H <sub>5</sub>                 | 0.108          | 174972.285                            | 0.109          | 160346.769                            |
| C <sub>5</sub> -H <sub>6</sub>                 | 0.108          | 177194.675                            | 0.109          | 162746.632                            |
| C <sub>6</sub> -H <sub>7</sub>                 | 0.108          | 177195.752                            | 0.109          | 162746.602                            |
| C <sub>7</sub> -H <sub>8</sub>                 | 0.108          | 177695.924                            | 0.109          | 163467.850                            |
| Bond angle                                     | HF             |                                       | MP2            |                                       |
|                                                | $\theta_o$ (°) | $k_\theta$ (kJ/mol/rad <sup>2</sup> ) | $\theta_o$ (°) | $k_\theta$ (kJ/mol/rad <sup>2</sup> ) |
| C <sub>1</sub> -C <sub>2</sub> -C <sub>3</sub> | 120.891        | 235.101                               | 120.816        | 166.314                               |
| C <sub>1</sub> -C <sub>2</sub> -C <sub>4</sub> | 120.860        | 235.062                               | 120.816        | 166.489                               |
| C <sub>2</sub> -C <sub>3</sub> -C <sub>5</sub> | 120.990        | 238.825                               | 120.817        | 179.752                               |
| C <sub>2</sub> -C <sub>4</sub> -C <sub>6</sub> | 120.991        | 238.518                               | 120.977        | 179.754                               |
| C <sub>3</sub> -C <sub>2</sub> -C <sub>4</sub> | 118.240        | 408.253                               | 118.977        | 211.767                               |
| C <sub>3</sub> -C <sub>5</sub> -C <sub>7</sub> | 120.219        | 261.361                               | 120.338        | 207.856                               |
| C <sub>4</sub> -C <sub>6</sub> -C <sub>7</sub> | 120.219        | 261.068                               | 120.107        | 207.856                               |
| C <sub>5</sub> -C <sub>7</sub> -C <sub>6</sub> | 119.341        | 365.274                               | 119.107        | 203.478                               |
| H <sub>1</sub> -C <sub>1</sub> -H <sub>2</sub> | 107.611        | 262.262                               | 108.495        | 136.390                               |
| H <sub>1</sub> -C <sub>1</sub> -H <sub>3</sub> | 107.976        | 204.014                               | 107.082        | 163.676                               |
| H <sub>2</sub> -C <sub>1</sub> -H <sub>3</sub> | 107.619        | 229.373                               | 107.695        | 180.226                               |
| H <sub>1</sub> -C <sub>1</sub> -C <sub>2</sub> | 111.278        | 146.042                               | 111.028        | 186.814                               |
| H <sub>2</sub> -C <sub>1</sub> -C <sub>2</sub> | 110.908        | 136.360                               | 111.028        | 182.659                               |
| H <sub>3</sub> -C <sub>1</sub> -C <sub>2</sub> | 111.280        | 144.634                               | 111.160        | 108.718                               |
| C <sub>2</sub> -C <sub>3</sub> -H <sub>4</sub> | 119.565        | 84.937                                | 119.445        | 71.724                                |
| C <sub>2</sub> -C <sub>4</sub> -H <sub>5</sub> | 119.561        | 84.928                                | 119.445        | 71.724                                |
| C <sub>3</sub> -C <sub>5</sub> -H <sub>6</sub> | 119.724        | 99.254                                | 119.811        | 76.539                                |
| C <sub>4</sub> -C <sub>6</sub> -H <sub>7</sub> | 119.727        | 99.248                                | 119.811        | 76.539                                |
| C <sub>5</sub> -C <sub>3</sub> -H <sub>4</sub> | 119.445        | 98.751                                | 119.578        | 76.323                                |
| C <sub>6</sub> -C <sub>4</sub> -H <sub>5</sub> | 119.449        | 98.762                                | 119.578        | 76.323                                |
| C <sub>5</sub> -C <sub>7</sub> -H <sub>8</sub> | 120.330        | 99.226                                | 120.252        | 77.688                                |
| C <sub>6</sub> -C <sub>7</sub> -H <sub>8</sub> | 120.328        | 99.229                                | 120.252        | 77.702                                |
| C <sub>7</sub> -C <sub>6</sub> -H <sub>7</sub> | 120.054        | 87.592                                | 120.082        | 75.873                                |
| C <sub>7</sub> -C <sub>5</sub> -H <sub>6</sub> | 120.057        | 87.611                                | 120.082        | 75.873                                |

Table 2: Bond stretch and bond angle force constants and equilibrium constants for a MOLD.

| Bond stretch                                       | HF             |                                       | B3LYP          |                                       | WB97XD         |                                       |
|----------------------------------------------------|----------------|---------------------------------------|----------------|---------------------------------------|----------------|---------------------------------------|
|                                                    | $b_o$ (nm)     | $k_b$ (kJ/mol/nm <sup>2</sup> )       | $b_o$ (nm)     | $k_b$ (kJ/mol/nm <sup>2</sup> )       | $b_o$ (nm)     | $k_b$ (kJ/mol/nm <sup>2</sup> )       |
| C <sub>1</sub> -C <sub>2</sub>                     | 0.154          | 59378.641                             | 0.155          | 91021.542                             | 0.154          | 97735.125                             |
| C <sub>1</sub> -C <sub>4</sub>                     | 0.147          | 111358.175                            | 0.153          | 94658.110                             | 0.152          | 107782.771                            |
| C <sub>1</sub> -N <sub>1</sub>                     | 0.140          | 134946.337                            | 0.148          | 77825.379                             | 0.147          | 117654.301                            |
| C <sub>2</sub> -N <sub>2</sub>                     | 0.145          | 102898.923                            | 0.146          | 115277.582                            | 0.145          | 94802.287                             |
| N <sub>2</sub> -C <sub>3</sub>                     | 0.144          | 123252.292                            | 0.145          | 105553.018                            | 0.145          | 105111.980                            |
| C <sub>3</sub> -N <sub>1</sub>                     | 0.145          | 133053.768                            | 0.146          | 93002.661                             | 0.145          | 114547.475                            |
| N <sub>2</sub> -C <sub>5</sub>                     | 0.145          | 135726.925                            | 0.146          | 107684.979                            | 0.145          | 116199.712                            |
| N <sub>1</sub> -C <sub>1</sub> 1                   | 0.145          | 141711.184                            | 0.146          | 64328.327                             | 0.145          | 130529.676                            |
| ...                                                |                |                                       |                |                                       |                |                                       |
| C <sub>1</sub> 5-C <sub>1</sub> 6                  | 0.156          | 61226.075                             | 0.155          | 97598.267                             | 0.153          | 95379.861                             |
| C <sub>1</sub> 6-O <sub>3</sub>                    | 0.125          | 169559.719                            | 0.134          | 146722.655                            | 0.134          | 123044.091                            |
| C <sub>1</sub> 6-O <sub>4</sub>                    | 0.121          | 191408.971                            | 0.121          | 353759.366                            | 0.121          | 103987.879                            |
| C <sub>1</sub> 5-H <sub>2</sub> 9                  | 0.108          | 55304.396                             | 0.110          | 106238.673                            | 0.110          | 153883.152                            |
| C <sub>1</sub> 5-N <sub>4</sub>                    | 0.152          | 64744.492                             | 0.148          | 92326.797                             | 0.147          | 136728.429                            |
| N <sub>4</sub> -H <sub>3</sub> 0                   | 0.103          | 196128.777                            | 0.186          | -1001.003                             | 0.187          | 2306.120                              |
| N <sub>4</sub> -H <sub>3</sub> 1                   | 0.101          | 105156.593                            | 0.132          | 174195.469                            | 0.101          | 173971.740                            |
| N <sub>4</sub> -H <sub>3</sub> 2                   | 0.101          | 95376.617                             | 0.102          | 205622.255                            | 0.102          | 211003.241                            |
| Bond angle                                         | HF             |                                       | B3LYP          |                                       | WB97XD         |                                       |
|                                                    | $\theta_o$ (°) | $k_\theta$ (kJ/mol/rad <sup>2</sup> ) | $\theta_o$ (°) | $k_\theta$ (kJ/mol/rad <sup>2</sup> ) | $\theta_o$ (°) | $k_\theta$ (kJ/mol/rad <sup>2</sup> ) |
| C <sub>4</sub> -C <sub>1</sub> -C <sub>2</sub>     | 113.414        | 318.477                               | 113.761        | 202.118                               | 113.521        | 246.737                               |
| C <sub>4</sub> -C <sub>1</sub> -N <sub>1</sub>     | 110.789        | 227.630                               | 110.805        | 256.846                               | 110.530        | 204.262                               |
| C <sub>1</sub> -C <sub>2</sub> -N <sub>2</sub>     | 103.071        | 336.720                               | 103.955        | 231.904                               | 103.295        | 202.970                               |
| C <sub>1</sub> -N <sub>1</sub> -C <sub>3</sub>     | 107.396        | 375.523                               | 107.243        | 207.183                               | 107.351        | 199.916                               |
| C <sub>2</sub> -N <sub>2</sub> -C <sub>3</sub>     | 103.390        | 323.220                               | 103.706        | 188.027                               | 103.560        | 287.356                               |
| N <sub>1</sub> -C <sub>3</sub> -N <sub>2</sub>     | 103.793        | 250.187                               | 103.923        | 175.117                               | 103.140        | 189.028                               |
| ...                                                |                |                                       |                |                                       |                |                                       |
| O <sub>4</sub> -C <sub>1</sub> 6-O <sub>3</sub>    | 130.227        | 485.763                               | 122.863        | 147.241                               | 122.840        | 364.071                               |
| O <sub>4</sub> -C <sub>1</sub> 6-C <sub>1</sub> 5  | 116.718        | 335.193                               | 123.562        | 155.483                               | 123.752        | 294.461                               |
| O <sub>3</sub> -C <sub>1</sub> 6-C <sub>1</sub> 5  | 113.078        | 296.972                               | 113.555        | 141.299                               | 113.381        | 345.322                               |
| C <sub>1</sub> 6-C <sub>1</sub> 5-H <sub>2</sub> 9 | 110.803        | 327.222                               | 106.992        | 191.918                               | 106.851        | 121.548                               |
| C <sub>1</sub> 6-C <sub>1</sub> 5-N <sub>4</sub>   | 104.186        | 238.229                               | 107.843        | 265.474                               | 107.914        | 181.744                               |
| H <sub>2</sub> 9-C <sub>1</sub> 5-N <sub>4</sub>   | 108.172        | 279.257                               | 112.879        | 238.263                               | 113.399        | 95.011                                |
| C <sub>1</sub> 5-N <sub>4</sub> -H <sub>3</sub> 0  | 102.658        | 111.257                               | 83.991         | 21.584                                | 83.786         | 51.992                                |
| C <sub>1</sub> 5-N <sub>4</sub> -H <sub>3</sub> 1  | 114.182        | 238.440                               | 111.317        | 234.889                               | 111.440        | 135.813                               |
| C <sub>1</sub> 5-N <sub>4</sub> -H <sub>3</sub> 2  | 112.234        | 251.319                               | 111.236        | 91.949                                | 111.517        | 213.310                               |
| H <sub>3</sub> 0-N <sub>4</sub> -H <sub>3</sub> 1  | 111.791        | 102.048                               | 133.172        | 40.772                                | 130.976        | 43.035                                |
| H <sub>3</sub> 0-N <sub>4</sub> -H <sub>3</sub> 2  | 107.028        | 121.242                               | 107.185        | 31.9726                               | 108.939        | 31.402                                |
| H <sub>3</sub> 2-N <sub>4</sub> -H <sub>3</sub> 1  | 108.657        | 250.355                               | 107.330        | 64.151                                | 107.634        | 132.936                               |

Table 3: Bond stretch and bond angle force constants and equilibrium constants for a zinc binding centre.

| Bond stretch                      | HF             |                                       | B3LYP          |                                       | B3PW91         |                                       |
|-----------------------------------|----------------|---------------------------------------|----------------|---------------------------------------|----------------|---------------------------------------|
|                                   | $b_o$ (nm)     | $k_b$ (kJ/mol/nm <sup>2</sup> )       | $b_o$ (nm)     | $k_b$ (kJ/mol/nm <sup>2</sup> )       | $b_o$ (nm)     | $k_b$ (kJ/mol/nm <sup>2</sup> )       |
| N <sub>1</sub> -Zn                | 0.208          | 24972.189                             | 0.207          | 38186.498                             | 0.206          | 29314.894                             |
| N <sub>2</sub> -Zn                | 0.207          | 10120.548                             | 0.207          | 12537.478                             | 0.206          | 15342.023                             |
| N <sub>3</sub> -Zn                | 0.205          | 29186.807                             | 0.208          | 27360.235                             | 0.207          | 21777.239                             |
| O <sub>1</sub> -Zn                | 0.195          | 32679.279                             | 0.201          | 25746.753                             | 0.200          | 26324.168                             |
| Bond angle                        | HF             |                                       | B3LYP          |                                       | B3PW91         |                                       |
|                                   | $\theta_o$ (°) | $k_\theta$ (kJ/mol/rad <sup>2</sup> ) | $\theta_o$ (°) | $k_\theta$ (kJ/mol/rad <sup>2</sup> ) | $\theta_o$ (°) | $k_\theta$ (kJ/mol/rad <sup>2</sup> ) |
| N <sub>1</sub> -Zn-N <sub>2</sub> | 110.014        | 182.932                               | 111.471        | 134.866                               | 111.525        | 249.867                               |
| N <sub>3</sub> -Zn-O <sub>1</sub> | 97.290         | 159.586                               | 94.660         | 94.259                                | 94.314         | 89.958                                |
| N <sub>4</sub> -Zn-N <sub>3</sub> | 115.731        | 87.810                                | 114.569        | 103.374                               | 114.508        | 124.739                               |
| N <sub>2</sub> -Zn-O <sub>1</sub> | 106.721        | 91.759                                | 114.600        | 96.787                                | 115.321        | 94.642                                |
| N <sub>2</sub> -Zn-N <sub>3</sub> | 109.443        | 122.018                               | 108.803        | 98.390                                | 108.712        | 103.314                               |
| O <sub>1</sub> -Zn-N <sub>3</sub> | 116.828        | 167.950                               | 112.330        | 67.774                                | 112.056        | 66.996                                |

Table 4: Laplacian bond order for toluene.

| Bond                           | HF       | MP2      |
|--------------------------------|----------|----------|
| C <sub>1</sub> -C <sub>2</sub> | 1.284794 | 1.306510 |
| C <sub>2</sub> -C <sub>3</sub> | 1.795650 | 1.748262 |
| C <sub>2</sub> -C <sub>4</sub> | 1.794852 | 1.748267 |
| C <sub>3</sub> -C <sub>5</sub> | 1.825264 | 1.781232 |
| C <sub>4</sub> -C <sub>6</sub> | 1.826044 | 1.781231 |
| C <sub>5</sub> -C <sub>7</sub> | 1.831004 | 1.783064 |
| C <sub>6</sub> -C <sub>7</sub> | 1.830184 | 1.783067 |
| C <sub>1</sub> -H <sub>1</sub> | 0.863936 | 0.839790 |
| C <sub>1</sub> -H <sub>2</sub> | 0.846973 | 0.839797 |
| C <sub>1</sub> -H <sub>3</sub> | 0.863425 | 0.824890 |
| C <sub>3</sub> -H <sub>4</sub> | 0.886123 | 0.853989 |
| C <sub>4</sub> -H <sub>5</sub> | 0.886034 | 0.853990 |
| C <sub>5</sub> -H <sub>6</sub> | 0.892607 | 0.861999 |
| C <sub>6</sub> -H <sub>7</sub> | 0.892625 | 0.861998 |
| C <sub>7</sub> -H <sub>8</sub> | 0.888990 | 0.858737 |

Table 5: Laplacian bond order for MOLD.

| Bond                             | HF       | B3LYP    | WB97XD   |
|----------------------------------|----------|----------|----------|
| C <sub>1</sub> -C <sub>2</sub>   | 1.221273 | 0.987163 | 1.023464 |
| C <sub>1</sub> -C <sub>4</sub>   | 1.265259 | 1.047901 | 1.071812 |
| C <sub>1</sub> -N <sub>1</sub>   | 0.866105 | 0.660360 | 0.694804 |
| C <sub>2</sub> -N <sub>2</sub>   | 0.954822 | 0.732890 | 0.772124 |
| N <sub>2</sub> -C <sub>3</sub>   | 1.030577 | 0.799955 | 0.831084 |
| C <sub>3</sub> -N <sub>1</sub>   | 0.994014 | 0.781099 | 0.803401 |
| N <sub>2</sub> -C <sub>5</sub>   | 0.947139 | 0.743520 | 0.772003 |
| N <sub>1</sub> -C <sub>11</sub>  | 0.963764 | 0.750147 | 0.785709 |
| ...                              |          |          |          |
| C <sub>15</sub> -C <sub>16</sub> | 1.215368 | 1.026716 | 1.077801 |
| C <sub>16</sub> -O <sub>3</sub>  | 1.234298 | 0.618620 | 0.632717 |
| C <sub>16</sub> -O <sub>4</sub>  | 1.445232 | 1.250907 | 1.299047 |
| C <sub>15</sub> -H <sub>29</sub> | 0.896539 | 0.782734 | 0.791491 |
| C <sub>15</sub> -N <sub>4</sub>  | 0.680474 | 0.724798 | 0.760664 |
| N <sub>4</sub> -H <sub>30</sub>  | 0.686890 | NA       | NA       |
| N <sub>4</sub> -H <sub>31</sub>  | 0.792246 | 0.705839 | 0.708033 |
| N <sub>4</sub> -H <sub>32</sub>  | 0.793018 | 0.711315 | 0.720225 |

Table 6: Laplacian bond order for a zinc binding centre.

| Bond               | HF       | B3LYP    | B3PW91   |
|--------------------|----------|----------|----------|
| N <sub>1</sub> -Zn | 0.260113 | 0.243007 | 0.251249 |
| N <sub>2</sub> -Zn | 0.267039 | 0.241378 | 0.247556 |
| N <sub>3</sub> -Zn | 0.264694 | 0.233681 | 0.240049 |
| O <sub>1</sub> -Zn | 0.166463 | 0.137009 | 0.138954 |
